# Supplementary material
Source: publisher figshare collection journal article supplement (https://karger.figshare.com/articles/dataset/_/6188516)

# Supplementary Figure 1. Sumitomo et al.

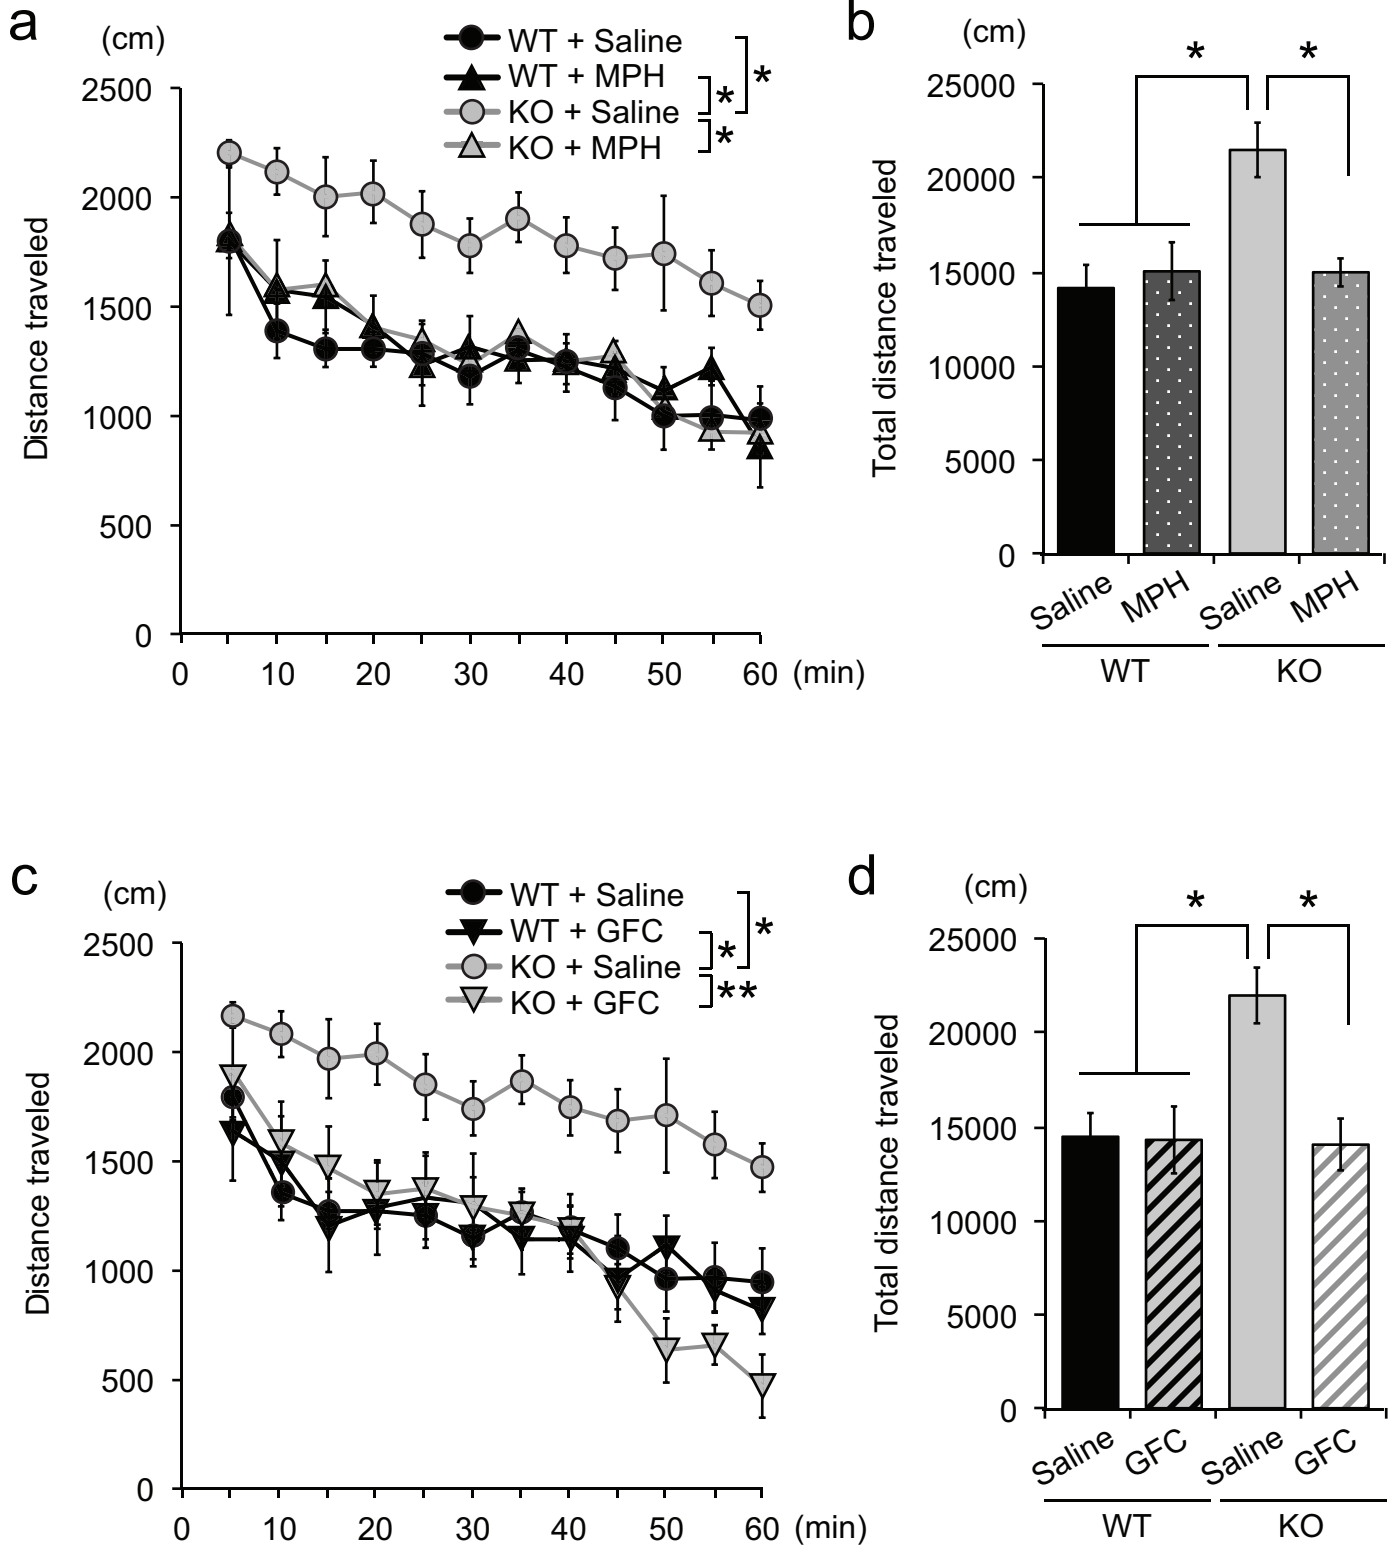

Supplement: Supplementary file 1 [file 1]

Supplementary Figure 4. Sumitomo et al.

a

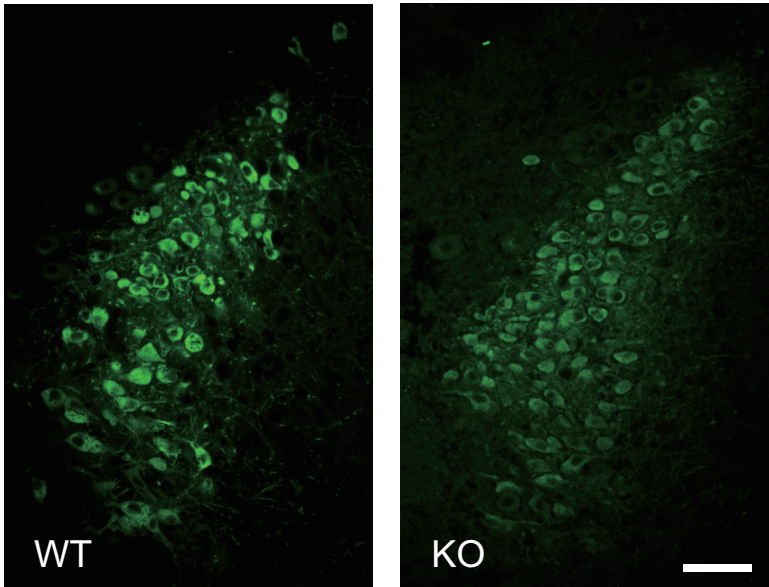

b

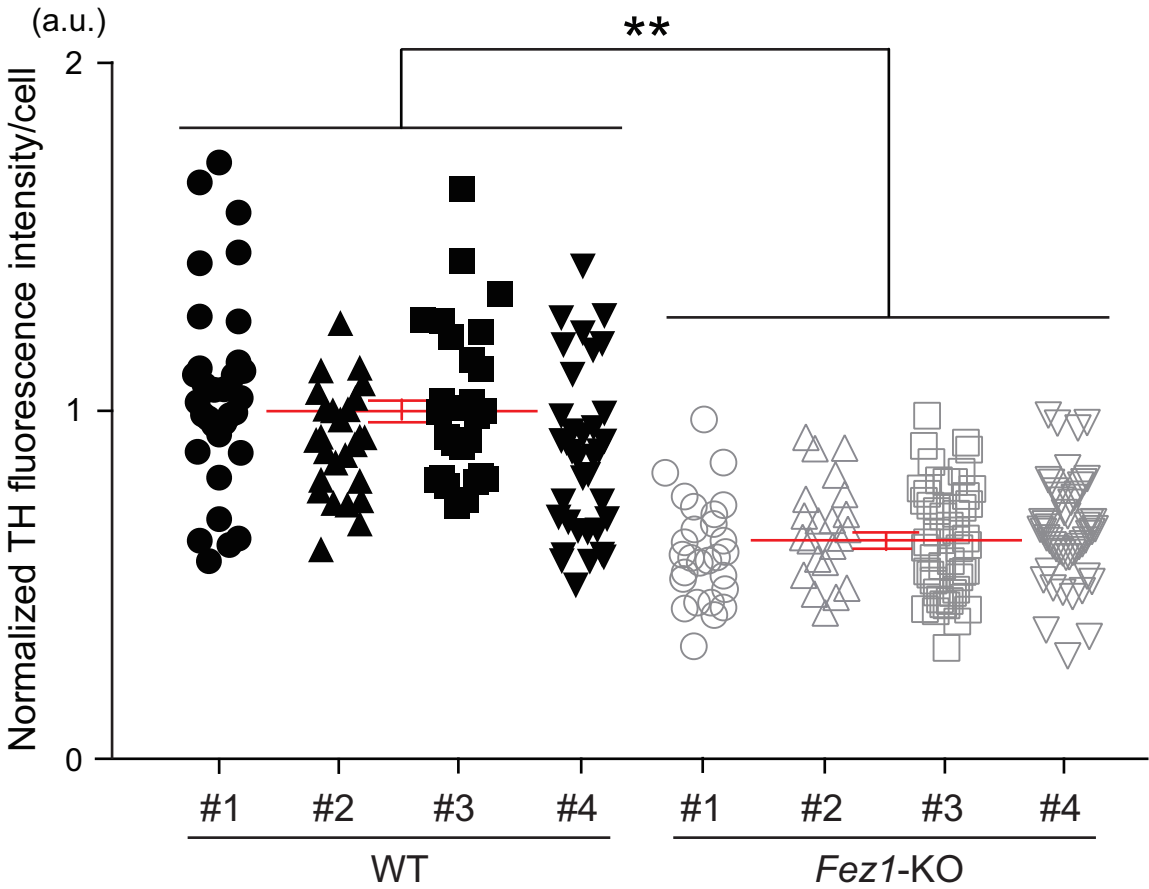

Supplement: Supplementary file 2 [file 1]

Supplementary Figure 3. Sumitomo et al.

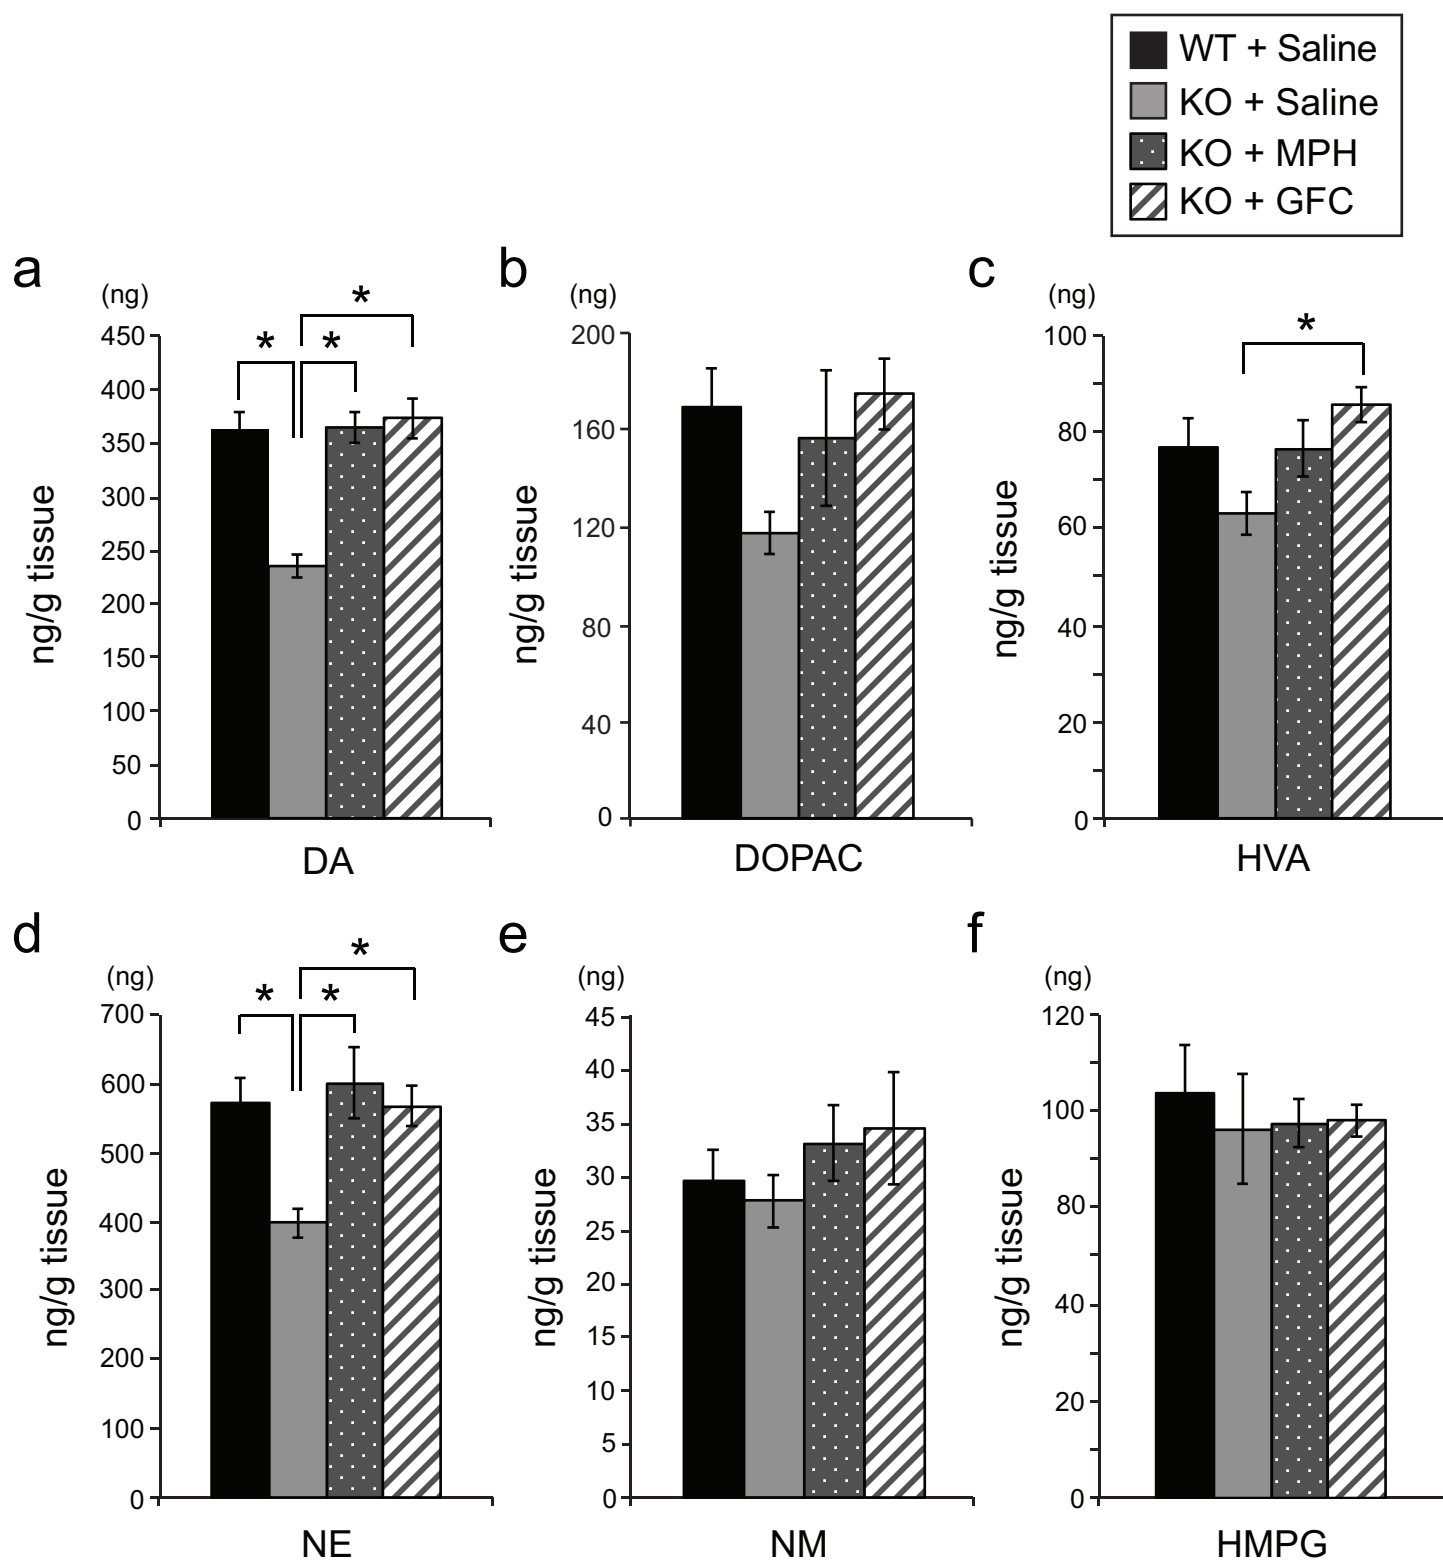

Supplement: Supplementary file 3 [file 1]

## Supplementary Figure 2. Sumitomo et al.

**a**

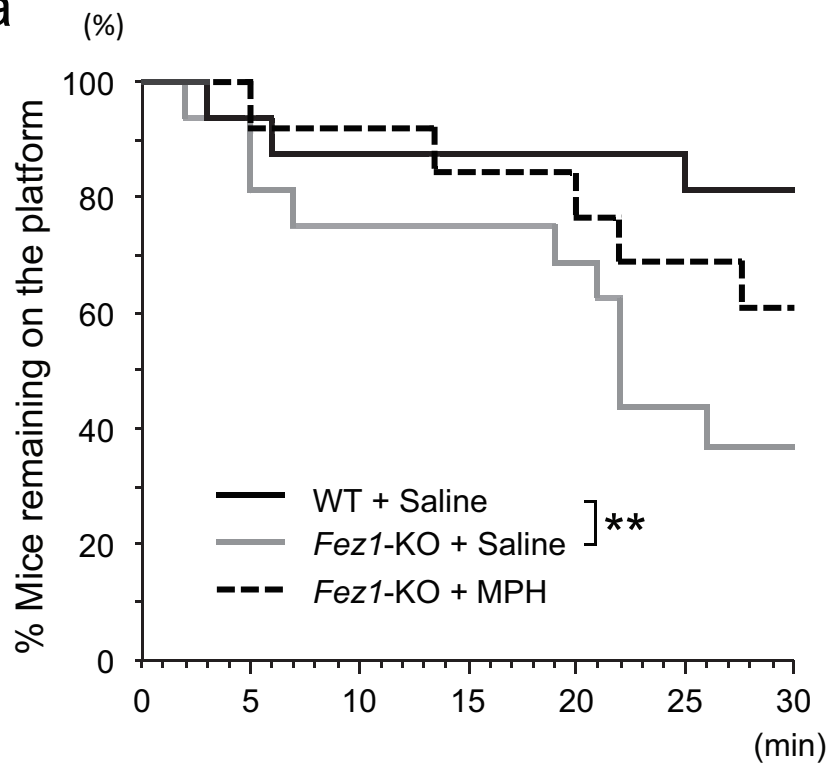

**b**

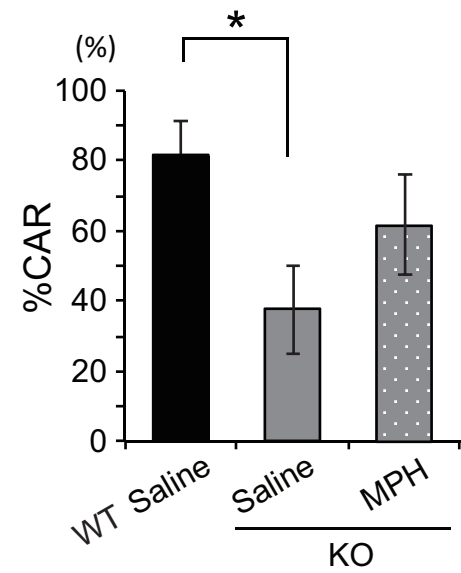

Supplement: Supplementary file 4 [file 1]
